# Supplementary material for: The Influence of Maternal BMI on Adverse Pregnancy Outcomes in Older Women
Source: PubMed Central journal article supplement (PMC7551140; doi:10.3390/nu12092838), 2020-09-16
Supplement: nutrients-12-02838-s001.pdf [file nutrients-12-02838-s001.pdf]

**Supplementary Materials**
**Table S1.** Maternal age categories among the women developing adverse pregnancy outcomes.

| Characteristics of maternal age categories in pregnancy results # |                      |                        |                        |                        |                      |
|-------------------------------------------------------------------|----------------------|------------------------|------------------------|------------------------|----------------------|
| Outcomes                                                          | 18–24 Years          | 25–29 Years            | 30–34 Years            | 35–39 Years            | ≥ 40 Years           |
| Total                                                             | <i>n</i> = 40 (4.4%) | <i>n</i> = 144 (15.8%) | <i>n</i> = 249 (27.3%) | <i>n</i> = 403 (44.2%) | <i>n</i> = 76 (8.3%) |
| Whole cohort                                                      | 40 (4.4%)            | 144 (15.8%)            | 249 (27.3%)            | 403 (44.2%)            | 76 (8.3%)            |
| PE                                                                | 2 (8.3%)             | 2 (8.3%)               | 5 (20.8%)              | 14 (58.3%)             | 1 (4.2%)             |
| IUGR                                                              | 2 (9.5%)             | 3 (14.3%)              | 5 (23.8%)              | 8 (38.1%)              | 3 (14.3%)            |
| Birth <37th week                                                  | 4 (6.2%)             | 7 (10.8%)              | 11 (16.9%)             | 36 (55.4%)             | 7 (10.8%)            |
| SGA                                                               | 5 (6.9%)             | 13 (18.1%)             | 12 (16.7%)             | 31 (43.1%)             | 11 (15.3%)           |
| LBW **                                                            | 3 (5.0%)             | 7 (11.7%)              | 9 (15.0%)              | 29 (48.3%)             | 12 (20.0%)           |
| Cesarean s. ***                                                   | 8 (2.1%)             | 50 (13.1%)             | 98 (25.7%)             | 184 (48.2%)            | 42 (11%)             |
| LGA *                                                             | 1 (1.0%)             | 18 (18.2%)             | 19 (19.2%)             | 48 (48.5%)             | 13 (13.1%)           |
| HBW >4000g *                                                      | 1 (1.0%)             | 20 (20.6%)             | 18 (18.6%)             | 43 (44.3%)             | 15 (15.5%)           |
| GH ***                                                            | 2 (1.8%)             | 11 (9.7%)              | 28 (24.8%)             | 56 (49.6%)             | 16 (14.2%)           |
| GDM-1 ***                                                         | 2 (1.6%)             | 14 (11.2%)             | 22 (17.6%)             | 73 (58.4%)             | 14 (11.2%)           |
| GDM-2                                                             | 0 (0%)               | 3 (14.3%)              | 5 (23.8%)              | 10 (47.6%)             | 3 (14.3%)            |

# For each pregnancy result, the Cochran–Armitage test was used to detect a trend of maternal age categories (and *p*-value < 0.05 was assumed to be significant, for comparisons of the trend between cases and controls); \* *p*-value was < 0.05; \*\* *p*-value was < 0.01; \*\*\* *p*-value was ≤ 0.001. PE: preeclampsia; IUGR: intrauterine growth restriction; SGA: small-for-gestational age birth weight; LBW: low birth weight; Cesarean s.: Cesarean section; LGA: large-for-gestational age birth weight; HBW: high birth weight; GH: gestational hypertension; GDM: gestational diabetes mellitus (treated with a diet (-1) and with insulin therapy (-2)).

**Table S2.** The adjusted odds ratios of adverse pregnancy results for maternal age ≥ 35 years.

| Adjusted odds ratios of pregnancy results for maternal age ≥ 35 years |            |                          |                          |
|-----------------------------------------------------------------------|------------|--------------------------|--------------------------|
| Pregnancy results                                                     | < 35 Years | ≥ 35 Years               | ≥ 35 Years               |
|                                                                       | Ref        | OR (95% CI)              | AOR (95% CI)             |
| PE                                                                    | 1          | 1.63 (0.7-3.77); 0.254   | 1.28 (0.51-3.2); 0.604   |
| IUGR                                                                  | 1          | 1.00 (0.42-2.37); 0.991  | 1.29 (0.51-3.27); 0.59   |
| Birth < 37th week                                                     | 1          | 1.84 (1.08-3.13); 0.024  | 1.55 (0.85-2.83); 0.152  |
| SGA                                                                   | 1          | 1.36 (0.83-2.22); 0.220  | 1.47 (0.85-2.54); 0.167  |
| LBW                                                                   | 1          | 2.13 (1.21-3.74); 0.008  | 2.27 (1.25-4.12); 0.007  |
| Cesarean section                                                      | 1          | 1.59 (1.22-2.07); 0.001  | 1.63 (1.22-2.17); 0.001  |
| LGA                                                                   | 1          | 1.56 (1.01-2.4); 0.043   | 1.23 (0.78-1.94); 0.374  |
| HBW (> 4000g)                                                         | 1          | 1.47 (0.95-2.26); 0.081  | 1.29 (0.79-2.08); 0.308  |
| GH                                                                    | 1          | 1.72 (1.14-2.58); 0.010  | 1.75 (1.09-2.81); 0.021  |
| GDM-1                                                                 | 1          | 2.34 (1.56-3.51); <0.001 | 2.60 (1.67-4.06); <0.001 |
| GDM-2                                                                 | 1          | 1.66 (0.68-4.05); 0.266  | 1.35 (0.48-3.77); 0.573  |

OR and AOR: odds ratios and adjusted odds ratios (with 95% confidence intervals) were examined in uni- and multi-dimensional logistic regression, respectively (*p*-value < 0.05 was assumed to be significant), and the confounding variables in multi-dimensional models are described in the Statistical Analysis section. PE: preeclampsia; IUGR: intrauterine growth restriction; SGA: small-for-gestational age birth weight; LBW: low birth weight; HBW: high birth weight; GH: gestational hypertension; GDM: gestational diabetes mellitus (treated with a diet (-1) and with insulin therapy (-2)).

**Table S3.** Basic characteristics of the women with overweight and obesity.

| Maternal characteristics /<br>Pregnancy outcomes | BMI $\geq$ 25 kg/m <sup>2</sup> | Normal BMI                      | <i>p</i> * |
|--------------------------------------------------|---------------------------------|---------------------------------|------------|
|                                                  | ( <i>n</i> = 272)               | ( <i>n</i> = 593)               |            |
|                                                  | Median (IQ range)/ <i>n</i> (%) | Median (IQ range)/ <i>n</i> (%) |            |
| Pre-pregnancy BMI (kg/m <sup>2</sup> )           | 28.7 (26.7-31.3)                | 21.7 (20.3-23.2)                | <0.0001    |
| Overweight                                       | 173                             | -                               |            |
| Obesity $\geq$ 30 kg/m <sup>2</sup>              | 98                              | -                               |            |
| Edema                                            | 17 (6.3%)                       | 24 (4%)                         | 0.153      |
| Gestational weight gain GWG categories:          |                                 |                                 | <0.0001    |
| below the range                                  | 39 (14.4%)                      | 177 (29.8%)                     |            |
| in the range                                     | 72 (26.6%)                      | 246 (41.5%)                     |            |
| above the range                                  | 160 (59%)                       | 170 (28.7%)                     |            |
| Maternal age (years)                             | 35 (32-37)                      | 35 (30-37)                      | 0.003      |
| Age categories                                   |                                 |                                 |            |
| 18-24                                            | 7 (2.6%)                        | 27 (4.6%)                       | 0.0005     |
| 25-29                                            | 32 (11.8%)                      | 102 (17.2%)                     |            |
| 30-34                                            | 67 (24.7%)                      | 165 (27.8%)                     |            |
| 35-39                                            | 132 (48.7%)                     | 257 (43.3%)                     |            |
| $\geq$ 40                                        | 33 (12.2%)                      | 42 (7.1%)                       |            |
| Primiparity                                      | 101 (37.3%)                     | 250 (42.2%)                     | 0.175      |
| Smoking before pregnancy                         | 65 (24%)                        | 90 (15.2%)                      | 0.002      |
| Multivitamins in pregnancy                       | 147 (54.2%)                     | 352 (59.4%)                     | 0.158      |
| Education <12 years #                            | 34 (14.3%)                      | 30 (5.8%)                       | 0.0001     |
| Lower financial status #                         | 67 (41.6%)                      | 58 (19.2%)                      | <0.0001    |
| Fetal sex. daughter                              | 128 (47.2%)                     | 287 (48.4%)                     | 0.750      |
| Birth < 37th week                                | 24 (8.9%)                       | 37 (6.2%)                       | 0.164      |
| Birth weight in percentiles:                     |                                 |                                 |            |
| < 10th percentile                                | 23 (8.5%)                       | 42 (7.1%)                       | 0.0002     |
| 10-90 percentile                                 | 201 (74.2%)                     | 503 (84.8%)                     |            |
| > 90th percentile                                | 47 (17.3%)                      | 48 (8.1%)                       |            |
| Birth weight in grams:                           |                                 |                                 | <0.0001    |

|                                     |             |             |         |
|-------------------------------------|-------------|-------------|---------|
| < 2500 g                            | 25 (9.2%)   | 32 (5.4%)   |         |
| 2500–4000 g                         | 197 (72.7%) | 517 (87.2%) |         |
| > 4000 g                            | 49 (18.1%)  | 44 (7.4%)   |         |
| APGAR in 5 <sup>th</sup> minute < 7 | 0 (0%)      | 2 (0.3%)    | -       |
| Cesarean section                    | 123 (45.4%) | 239 (40.3%) | 0.160   |
| PIH                                 | 74 (27.3%)  | 60 (10.1%)  | <0.0001 |
| GDM                                 | 58 (21.4%)  | 79 (13.3%)  | 0.003   |

\* The Mann–Whitney U test was used for comparisons of continuous variables, the Cochran–Armitage test was used to detect a trend, and for binomial categories the Pearson chi-square test (or Fisher exact test when Cochran assumption was not met) was used ( $p$ -value < 0.05 was assumed to be significant); # For available data. The APGAR score evaluates an appearance, pulse, grimace, activity, and respiration; PIH: pregnancy induced hypertension (preeclampsia and isolated gestational hypertension); GDM: gestational diabetes mellitus (treated with a diet and treated with insulin therapy). **Table S4.** The odds ratios of adverse pregnancy results for maternal age 18– 24 years (with regard to the age range of 25– 29 years), rated in the whole cohort and subgroups of pre-pregnancy BMI categories.

**Table S4.** The odds ratios of adverse pregnancy results for maternal age 18–24 years (with regard to the age range of 25–29 years), rated in the whole cohort and subgroups of pre-pregnancy BMI categories.

| Age                         |                    | 18–24 Years<br>( <i>n</i> = 40) | 25–29 Years<br>( <i>n</i> = 144) |
|-----------------------------|--------------------|---------------------------------|----------------------------------|
| Outcomes/<br>BMI categories | Cases/<br>Controls | OR(95%CI); <i>p</i> *           | Cases/<br>Controls               |
| <b>PE</b>                   |                    |                                 |                                  |
| Whole cohort                | 2/36               | 3.64 (0.5-26.74); 0.204         | 2/131                            |
| Underweight                 | 1/5                |                                 | 0/10                             |
| Normal BMI                  | 0/25               |                                 | 1/94                             |
| Overweight                  | 1/4                |                                 | 0/19                             |
| Obesity                     | 0/2                |                                 | 1/8                              |
| BMI ≥25 kg/m <sup>2</sup>   | 1/6                | 4.50 (0.25-82.57); 0.311        | 1/27                             |
| <b>IUGR</b>                 |                    |                                 |                                  |
| Whole cohort                | 2/38               | 2.46 (0.4-15.23); 0.334         | 3/140                            |
| Underweight                 | 1/5                | 1.80 (0.09-35.42); 0.699        | 1/9                              |
| Normal BMI                  | 1/26               | 1.90 (0.17-21.82); 0.605        | 2/99                             |
| Overweight                  | 0/5                |                                 | 0/22                             |
| Obesity                     | 0/2                |                                 | 0/10                             |
| BMI ≥25 kg/m <sup>2</sup>   | 0/7                |                                 | 0/32                             |
| <b>GA &lt; 37th w.</b>      |                    |                                 |                                  |
| Whole cohort                | 4/36               | 2.18 (0.6-7.84); 0.235          | 7/137                            |
| Underweight                 | 1/5                |                                 | 0/10                             |
| Normal BMI                  | 2/25               | 1.28 (0.24-6.73); 0.771         | 6/96                             |
| Overweight                  | 1/4                |                                 | 0/22                             |
| Obesity                     | 0/2                |                                 | 1/9                              |
| BMI ≥25 kg/m <sup>2</sup>   | 1/6                | 5.17 (0.28-94.5); 0.268         | 1/31                             |
| <b>SGA</b>                  |                    |                                 |                                  |
| Whole cohort                | 5/34               | 1.28 (0.43-3.84); 0.662         | 13/113                           |
| Underweight                 | 1/4                | 0.50 (0.04-6.68); 0.600         | 3/6                              |
| Normal BMI                  | 4/23               | 1.83 (0.51-6.61); 0.359         | 8/84                             |

|                                 |      |                          |        |
|---------------------------------|------|--------------------------|--------|
| Overweight                      | 0/5  |                          | 1/16   |
| Obesity                         | 0/2  |                          | 1/7    |
| BMI $\geq 25$ kg/m <sup>2</sup> | 0/7  |                          | 2/23   |
| <b>LBW</b>                      |      |                          |        |
| Whole cohort                    | 3/36 | 1.39 (0.34-5.67); 0.643  | 7/117  |
| Underweight                     | 1/4  |                          | 0/9    |
| Normal BMI                      | 2/25 | 1.38 (0.25-7.53); 0.713  | 5/86   |
| Overweight                      | 0/5  |                          | 1/15   |
| Obesity                         | 0/2  |                          | 1/7    |
| BMI $\geq 25$ kg/m <sup>2</sup> | 0/7  |                          | 2/22   |
| <b>Cesarean s.</b>              |      |                          |        |
| Whole cohort                    | 8/32 | 0.47 (0.2-1.1); 0.081    | 50/94  |
| Underweight                     | 1/5  | 0.80 (0.06-11.3); 0.869  | 2/8    |
| Normal BMI                      | 6/21 | 0.60 (0.22-1.62); 0.311  | 33/69  |
| Overweight                      | 1/4  | 0.36 (0.03-3.79); 0.396  | 9/13   |
| Obesity                         | 0/2  |                          | 6/4    |
| BMI $\geq 25$ kg/m <sup>2</sup> | 1/6  | 0.19 (0.02-1.75); 0.143  | 15/17  |
| <b>LGA</b>                      |      |                          |        |
| Whole cohort                    | 1/34 | 0.19 (0.02-1.43); 0.106  | 18/113 |
| Underweight                     | 1/4  | 1.50 (0.07-31.58); 0.794 | 1/6    |
| Normal BMI                      | 0/23 |                          | 10/84  |
| Overweight                      | 0/5  |                          | 5/16   |
| Obesity                         | 0/2  |                          | 2/7    |
| BMI $\geq 25$ kg/m <sup>2</sup> | 0/7  |                          | 7/23   |
| <b>HBW &gt;4000g</b>            |      |                          |        |
| Whole cohort                    | 1/36 | 0.16 (0.02-1.25); 0.081  | 20/117 |
| Underweight                     | 1/4  | 2.25 (0.11-45.72); 0.598 | 1/9    |
| Normal BMI                      | 0/25 |                          | 11/86  |
| Overweight                      | 0/5  |                          | 6/15   |
| Obesity                         | 0/2  |                          | 2/7    |
| BMI $\geq 25$ kg/m <sup>2</sup> | 0/7  |                          | 8/22   |
| <b>GH</b>                       |      |                          |        |

|                                 |      |                          |        |
|---------------------------------|------|--------------------------|--------|
| Whole cohort                    | 2/36 | 0.66 (0.14-3.12); 0.602  | 11/131 |
| Underweight                     | 0/5  |                          | 0/10   |
| Normal BMI                      | 2/25 | 1.07 (0.21-5.5); 0.931   | 7/94   |
| Overweight                      | 0/4  |                          | 3/19   |
| Obesity                         | 0/2  |                          | 1/8    |
| BMI $\geq 25$ kg/m <sup>2</sup> | 0/6  |                          | 4/27   |
| <b>GDM-1</b>                    |      |                          |        |
| Whole cohort                    | 2/38 | 0.48 (0.1-2.2); 0.342    | 14/127 |
| Underweight                     | 0/6  |                          | 3/7    |
| Normal BMI                      | 1/26 | 0.51 (0.06-4.34); 0.539  | 7/93   |
| Overweight                      | 0/5  |                          | 2/20   |
| Obesity                         | 1/1  | 3.50 (0.15-84.69); 0.441 | 2/7    |
| BMI $\geq 25$ kg/m <sup>2</sup> | 1/13 | 1.13 (0.11-11.95); 0.922 | 4/27   |
| <b>GDM-2</b>                    |      |                          |        |
| Whole cohort                    | 0/38 |                          | 3/127  |
| Underweight                     | 0/6  |                          | 0/7    |
| Normal BMI                      | 0/26 |                          | 2/93   |
| Overweight                      | 0/5  |                          | 0/20   |
| Obesity                         | 0/1  |                          | 1/7    |
| BMI $\geq 25$ kg/m <sup>2</sup> | 0/6  |                          | 1/27   |

\* OR: crude odds ratios (with 95% confidence intervals) were examined in the uni-dimensional logistic regression ( $p$ -value < 0.05 was assumed to be significant). PE: preeclampsia; IUGR: intrauterine growth restriction; GA: gestational age at childbirth; SGA: small-for-gestational age birth weight; LBW: low birth weight; Cesarean s.: Cesarean section; LGA: large-for-gestational age birth weight; HBW: high birth weight; GH: gestational hypertension; GDM: gestational diabetes mellitus (treated with a diet (-1) and with insulin therapy (-2)).
